# Supplementary material
Source: PubMed Central journal article supplement (PMC2661109)
Supplement: NIHMS98237-supplement-Supplementary.pdf [file NIHMS98237-supplement-Supplementary.pdf]

**Supplementary Table 1. Association of tagging SNPs in genes related to IGF-1 or IL-6 signaling with risk of multiple myeloma**

| SNP                                  | Minor allele | Frequency in controls | Genotype | Main analysis                      |                                        |                             | Secondary analysis                      |                          |
|--------------------------------------|--------------|-----------------------|----------|------------------------------------|----------------------------------------|-----------------------------|-----------------------------------------|--------------------------|
|                                      |              |                       |          | Cases (n=82)<br>N (%) <sup>*</sup> | Controls (n=164)<br>N (%) <sup>*</sup> | OR (95% CI) <sup>†</sup>    | Controls (n=2624)<br>N (%) <sup>*</sup> | OR (95% CI) <sup>†</sup> |
| <b>IGF-1 signaling pathway genes</b> |              |                       |          |                                    |                                        |                             |                                         |                          |
| <b>IGF1</b>                          |              |                       |          |                                    |                                        |                             |                                         |                          |
| Haplotype Block 1                    |              |                       |          |                                    |                                        |                             |                                         |                          |
| rs7965399                            | C            | 3.5                   | TT       | 70 (88.6)                          | 145 (92.9)                             | 1.0 (ref) <sup>§</sup>      | 2328 (92.8)                             | 1.0 (ref) <sup>§</sup>   |
|                                      |              |                       | CT       | 9 (11.4)                           | 11 (7.1)                               | 2.0 (0.8-5.1)               | 174 (6.9)                               | 1.8 (0.9-3.6)            |
|                                      |              |                       | CC       | 0                                  | 0                                      | NC <sup>  </sup>            | 6 (0.2)                                 | NC <sup>  </sup>         |
| rs35767                              | A            | 13.6                  | GG       | 56 (2.7)                           | 116 (73.4)                             | 1.0 (ref)                   | 1740 (70.2)                             | 1.0 (ref)                |
|                                      |              |                       | AG       | 20 (26.0)                          | 41 (25.9)                              | 0.9 (0.5-1.7)               | 678 (27.3)                              | 0.9 (0.5-1.5)            |
|                                      |              |                       | AA       | 1 (1.3)                            | 1 (0.6)                                | 1.9 (0.1-32.6)              | 62 (2.5)                                | 0.5 (0.07-3.9)           |
| Haplotype Block 2                    |              |                       |          |                                    |                                        |                             |                                         |                          |
| rs12821878<br>(HCV11752586)          | A            | 25.0                  | GG       | 44 (55.7)                          | 85 (55.2)                              | 1.0 (ref)                   | 1507 (60.6)                             | 1.0 (ref)                |
|                                      |              |                       | AG       | 35 (44.3)                          | 61 (39.6)                              | 1.2 (0.7-2.2) <sup>**</sup> | 864 (34.8)                              | 1.4 (0.9-2.2)            |
|                                      |              |                       | AA       | 0                                  | 8 (5.2)                                | NC                          | 114 (4.6)                               | NC                       |
| rs1019731                            | A            | 15.3                  | CC       | 59 (73.8)                          | 115 (71.9)                             | 1.0 (ref)                   | 1919 (75.3)                             | 1.0 (ref)                |
|                                      |              |                       | CA       | 19 (23.8)                          | 41 (25.6)                              | 0.9 (0.5-1.8)               | 588 (23.1)                              | 1.0 (0.6-1.8)            |
|                                      |              |                       | AA       | 2 (2.5)                            | 4 (2.5)                                | 0.9 (0.2-5.3)               | 43 (1.7)                                | 1.6 (0.4-6.6)            |

|                           |   |      |    |           |            |                 |             |               |
|---------------------------|---|------|----|-----------|------------|-----------------|-------------|---------------|
| rs2195239                 | G | 26.7 | CC | 43 (55.1) | 85 (53.5)  | 1.0 (ref)       | 1511 (59.5) | 1.0 (ref)     |
|                           |   |      | CG | 26 (33.3) | 63 (39.6)  | 0.8 (0.4-1.5)   | 903 (35.6)  | 1.0 (0.6-1.7) |
|                           |   |      | GG | 9 (11.5)  | 11 (6.9)   | 1.6 (0.6-4.5)   | 125 (4.9)   | 2.6 (1.2-5.5) |
| Haplotype Block 3         |   |      |    |           |            |                 |             |               |
| rs10735380<br>(HCV346219) | G | 30.4 | AA | 39 (49.4) | 84 (52.2)  | 1.0 (ref)       | 1303 (52.8) | 1.0 (ref)     |
|                           |   |      | AG | 32 (40.5) | 56 (34.8)  | 1.1 (0.6-1.9)   | 973 (39.4)  | 1.1 (0.7-1.8) |
|                           |   |      | GG | 8 (10.1)  | 21 (13.0)  | 0.7 (0.3-1.9)   | 192 (7.8)   | 1.5 (0.7-3.3) |
| rs2373722                 | A | 7.0  | GG | 71 (91.0) | 136 (86.1) | 1.0 (ref)       | 2121 (84.8) | 1.0 (ref)     |
|                           |   |      | GA | 7 (9.0)   | 22 (13.9)  | 0.5 (0.2-1.3)   | 372 (14.9)  | 0.5 (0.2-1.1) |
|                           |   |      | AA | 0         | 0          | NC              | 8 (0.3)     | NC            |
| rs1549593                 | T | 16.7 | GG | 56 (74.7) | 113 (71.1) | 1.0 (ref)       | 1846 (75.5) | 1.0 (ref)     |
|                           |   |      | GT | 17 (22.7) | 39 (24.5)  | 0.9 (0.4-1.8)   | 551 (22.5)  | 1.0 (0.6-1.8) |
|                           |   |      | TT | 2 (2.7)   | 7 (4.4)    | 0.6 (0.1-3.3)   | 49 (2.0)    | 1.3 (0.3-5.6) |
| rs1520220                 | G | 20.3 | CC | 52 (64.2) | 108 (66.3) | 1.0 (ref)       | 1645 (66.2) | 1.0 (ref)     |
|                           |   |      | CG | 24 (29.6) | 44 (27.0)  | 1.0 (0.5-1.9)   | 748 (30.1)  | 1.1 (0.7-1.8) |
|                           |   |      | GG | 5 (6.2)   | 11 (6.7)   | 0.7 (0.2-2.5)   | 91 (3.7)    | 2.0 (0.8-5.1) |
| rs5742665<br>(HCV2801104) | G | 12.1 | CC | 65 (84.4) | 126 (78.2) | 1.0 (ref)       | 1883 (75.6) | 1.0 (ref)     |
|                           |   |      | CG | 12 (15.6) | 31 (19.3)  | 0.9 (0.4-2.0)** | 564 (22.6)  | 0.6 (0.3-1.1) |
|                           |   |      | GG | 0         | 4 (2.5)    | NC              | 44 (1.8)    | NC            |

Haplotype Block 4

|           |   |      |    |           |            |               |             |               |
|-----------|---|------|----|-----------|------------|---------------|-------------|---------------|
| rs2946834 | A | 32.8 | GG | 40 (50.0) | 81 (49.7)  | 1.0 (ref)     | 1134 (45.6) | 1.0 (ref)     |
|           |   |      | GA | 33 (41.3) | 57 (35.0)  | 1.3 (0.7-2.3) | 1069 (43.0) | 0.9 (0.6-1.5) |
|           |   |      | AA | 7 (8.8)   | 25 (15.3)  | 0.5 (0.2-1.4) | 282 (11.3)  | 0.8 (0.3-1.8) |
| rs4764876 | C | 27.2 | GG | 47 (59.5) | 90 (56.3)  | 1.0 (ref)     | 1361 (54.4) | 1.0 (ref)     |
|           |   |      | GC | 27 (34.2) | 53 (33.1)  | 1.0 (0.5-1.8) | 981 (39.2)  | 0.8 (0.5-1.2) |
|           |   |      | CC | 5 (6.3)   | 17 (10.6)  | 0.5 (0.1-1.6) | 158 (6.3)   | 0.9 (0.4-2.3) |
| rs4764695 | G | 47.8 | AA | 25 (31.3) | 47 (29.2)  | 1.0 (ref)     | 632 (25.0)  | 1.0 (ref)     |
|           |   |      | AG | 35 (43.8) | 74 (46.0)  | 0.8 (0.4-1.5) | 1297 (51.3) | 0.7 (0.4-1.2) |
|           |   |      | GG | 20 (25.0) | 40 (24.8)  | 1.0 (0.4-2.0) | 598 (23.7)  | 0.9 (0.5-1.6) |
| rs1996656 | G | 20.0 | AA | 51 (63.0) | 104 (65.0) | 1.0 (ref)     | 1685 (68.4) | 1.0 (ref)     |
|           |   |      | AG | 24 (29.6) | 48 (30.0)  | 1.0 (0.6-1.9) | 712 (28.9)  | 1.3 (0.8-2.1) |
|           |   |      | GG | 6 (7.4)   | 8 (5.0)    | 1.6 (0.5-5.2) | 68 (2.8)    | 3.5 (1.4-8.6) |

**IGFBP1 and IGFBP3<sup>‡</sup>**

Haplotype Block 1

|                          |   |      |    |           |            |               |             |               |
|--------------------------|---|------|----|-----------|------------|---------------|-------------|---------------|
| rs1022865<br>(HCV395979) | G | 36.7 | AA | 38 (48.1) | 61 (38.6)  | 1.0 (ref)     | 1169 (46.3) | 1.0 (ref)     |
|                          |   |      | AG | 35 (44.3) | 78 (49.4)  | 0.8 (0.5-1.5) | 1087 (43.0) | 1.0 (0.7-1.7) |
|                          |   |      | GG | 6 (7.6)   | 19 (12.0)  | 0.5 (0.2-1.6) | 270 (10.7)  | 0.7 (0.3-1.6) |
| rs1553009                | A | 19.1 | GG | 50 (63.3) | 106 (66.3) | 1.0 (ref)     | 1654 (65.1) | 1.0 (ref)     |
|                          |   |      | GA | 25 (31.7) | 47 (29.4)  | 1.2 (0.6-2.2) | 796 (31.4)  | 1.1 (0.7-1.8) |

|                           |   |      |    |           |            |                |             |               |
|---------------------------|---|------|----|-----------|------------|----------------|-------------|---------------|
|                           |   |      | AA | 4 (5.1)   | 7 (4.4)    | 1.3 (0.4-4.5)  | 89 (3.5)    | 1.5 (0.5-4.2) |
| rs35539615<br>(HCV395975) | G | 17.2 | CC | 47 (61.8) | 106 (67.5) | 1.0 (ref)      | 1488 (59.8) | 1.0 (ref)     |
|                           |   |      | CG | 27 (35.5) | 48 (30.6)  | 1.1 (0.6-2.0)  | 894 (35.9)  | 0.9 (0.5-1.4) |
|                           |   |      | GG | 2 (2.6)   | 3 (1.9)    | 2.1 (0.3-15.5) | 107 (4.3)   | 0.6 (0.1-2.4) |
| rs2201638                 | A | 2.9  | GG | 77 (96.3) | 147 (94.2) | 1.0 (ref)      | 2347 (93.4) | 1.0 (ref)     |
|                           |   |      | GA | 3 (3.8)   | 9 (5.8)    | 0.9 (0.2-3.6)  | 161 (6.4)   | 0.5 (0.2-1.7) |
|                           |   |      | AA | 0         | 0          | NC             | 6 (0.2)     | NC            |
| rs1065780                 | A | 41.3 | GG | 28 (35.4) | 54 (33.5)  | 1.0 (ref)      | 955 (38.0)  | 1.0 (ref)     |
|                           |   |      | GA | 37 (46.8) | 81 (50.3)  | 0.9 (0.5-1.6)  | 1190 (47.4) | 1.2 (0.7-1.9) |
|                           |   |      | AA | 14 (17.7) | 26 (16.2)  | 0.9 (0.4-2.2)  | 368 (14.6)  | 1.4 (0.7-2.7) |
| Haplotype Block 2         |   |      |    |           |            |                |             |               |
| rs4988515                 | T | 6.5  | CC | 72 (90.0) | 142 (87.7) | 1.0 (ref)      | 2263 (91.4) | 1.0 (ref)     |
|                           |   |      | CT | 8 (10.0)  | 19 (11.7)  | 0.8 (0.3-2.2)  | 206 (8.3)   | 1.4 (0.7-2.9) |
|                           |   |      | TT | 0         | 1 (0.6)    | NC             | 7 (0.3)     | NC            |
| rs4619                    | G | 37.9 | AA | 35 (43.8) | 57 (36.37) | 1.0 (ref)      | 1046 (42.3) | 1.0 (ref)     |
|                           |   |      | AG | 33 (41.3) | 81 (51.6)  | 0.7 (0.4-1.3)  | 1140 (46.1) | 1.0 (0.6-1.7) |
|                           |   |      | GG | 12 (15.0) | 19 (12.1)  | 1.0 (0.4-2.5)  | 285 (11.5)  | 1.4 (0.7-2.8) |
| rs1908751                 | T | 25.0 | CC | 41 (51.3) | 88 (55.0)  | 1.0 (ref)      | 1248 (49.8) | 1.0 (ref)     |
|                           |   |      | CT | 33 (41.3) | 64 (40.0)  | 1.2 (0.7-2.2)  | 1036 (41.3) | 1.0 (0.6-1.6) |
|                           |   |      | TT | 6 (7.5)   | 8 (5.0)    | 2.0 (0.6-6.2)  | 224 (8.9)   | 0.8 (0.4-2.0) |

|           |   |      |    |           |           |               |             |               |
|-----------|---|------|----|-----------|-----------|---------------|-------------|---------------|
| rs2270628 | T | 23.1 | CC | 55 (68.8) | 94 (59.5) | 1.0 (ref)     | 1601 (64.4) | 1.0 (ref)     |
|           |   |      | CT | 21 (26.3) | 55 (34.8) | 0.7 (0.4-1.3) | 787 (31.6)  | 0.9 (0.5-1.4) |
|           |   |      | TT | 4 (5.0)   | 9 (5.7)   | 0.7 (0.2-2.7) | 99 (4.0)    | 1.3 (0.5-3.8) |

Haplotype Block 3

|           |   |      |    |           |           |               |             |               |
|-----------|---|------|----|-----------|-----------|---------------|-------------|---------------|
| rs3110697 | A | 45.7 | GG | 20 (25.0) | 45 (27.8) | 1.0 (ref)     | 858 (34.6)  | 1.0 (ref)     |
|           |   |      | GA | 41 (51.3) | 86 (53.1) | 1.1 (0.5-2.1) | 1177 (47.4) | 1.6 (0.9-2.7) |
|           |   |      | AA | 19 (23.8) | 31 (19.1) | 1.5 (0.7-3.4) | 448 (18.0)  | 2.0 (1.1-3.7) |

|           |   |    |    |           |           |               |             |               |
|-----------|---|----|----|-----------|-----------|---------------|-------------|---------------|
| rs2854746 | C | 38 | GG | 33 (42.9) | 59 (37.3) | 1.0 (ref)     | 887 (37.1)  | 1.0 (ref)     |
|           |   |    | GC | 33 (42.9) | 78 (49.4) | 0.7 (0.4-1.3) | 1159 (48.4) | 0.9 (0.5-1.4) |
|           |   |    | CC | 11 (14.3) | 21 (13.3) | 0.8 (0.3-2.1) | 348 (14.5)  | 0.9 (0.4-1.8) |

|           |   |      |    |           |           |               |             |               |
|-----------|---|------|----|-----------|-----------|---------------|-------------|---------------|
| rs2854744 | T | 46.5 | GG | 20 (25.3) | 43 (27.7) | 1.0 (ref)     | 667 (27.2)  | 1.0 (ref)     |
|           |   |      | GT | 42 (53.2) | 80 (51.6) | 1.1 (0.6-2.2) | 1304 (53.2) | 1.1 (0.7-1.9) |
|           |   |      | TT | 17 (21.5) | 32 (20.7) | 1.0 (0.5-2.4) | 479 (19.6)  | 1.2 (0.7-2.4) |

|           |   |      |    |           |           |                |             |               |
|-----------|---|------|----|-----------|-----------|----------------|-------------|---------------|
| rs2132570 | T | 21.1 | GG | 46 (59.0) | 92 (59.7) | 1.0 (ref)      | 1553 (62.8) | 1.0 (ref)     |
|           |   |      | GT | 28 (35.9) | 59 (38.3) | 1.1 (0.6-1.9)  | 811 (32.8)  | 1.2 (0.7-1.9) |
|           |   |      | TT | 4 (5.1)   | 3 (2.0)   | 3.0 (0.6-14.2) | 109 (4.4)   | 1.4 (0.5-4.0) |

SNPs not within a defined haplotype block

|        |   |      |    |           |           |               |             |               |
|--------|---|------|----|-----------|-----------|---------------|-------------|---------------|
| rs6670 | A | 23.6 | TT | 50 (63.3) | 93 (58.5) | 1.0 (ref)     | 1577 (62.7) | 1.0 (ref)     |
|        |   |      | TA | 26 (32.9) | 57 (35.9) | 0.9 (0.5-1.6) | 822 (32.7)  | 1.1 (0.7-1.7) |
|        |   |      | AA | 3 (3.8)   | 9 (5.7)   | 0.5 (0.1-2.7) | 116 (4.6)   | 0.8 (0.3-2.8) |

|               |   |      |    |           |            |                |                   |               |
|---------------|---|------|----|-----------|------------|----------------|-------------------|---------------|
| rs2453839     | C | 20.7 | TT | 51 (63.8) | 103 (63.6) | 1.0 (ref)      | 1636 (65.0)       | 1.0 (ref)     |
|               |   |      | TC | 25 (31.3) | 51 (31.5)  | 0.9 (0.5-1.8)  | 789 (31.3)        | 1.0 (0.6-1.6) |
|               |   |      | CC | 4 (5.0)   | 8 (4.9)    | 1.1 (0.3-4.0)  | 93 (3.7)          | 1.3 (0.5-3.8) |
| <b>IGFBP2</b> |   |      |    |           |            |                |                   |               |
| rs3770473     | C | 32.8 | AA | 36 (46.2) | 73 (45.6)  | 1.0 (ref)      | N/A <sup>††</sup> |               |
|               |   |      | AC | 30 (38.5) | 69 (43.1)  | 0.7 (0.4-1.3)  |                   |               |
|               |   |      | CC | 12 (15.4) | 18 (11.3)  | 1.2 (0.5-2.8)  |                   |               |
| rs9341105     | C | 24.5 | TT | 43 (55.1) | 88 (55.3)  | 1.0 (ref)      | N/A               |               |
|               |   |      | TC | 28 (35.9) | 64 (40.3)  | 0.9 (0.5-1.6)  |                   |               |
|               |   |      | CC | 7 (9.0)   | 7 (4.4)    | 3.2 (0.9-11.2) |                   |               |
| rs9341130     | G | 9.4  | AA | 64 (83.1) | 127 (81.9) | 1.0 (ref)      | N/A               |               |
|               |   |      | AG | 12 (15.6) | 27 (17.4)  | 0.9 (0.4-2.0)  |                   |               |
|               |   |      | GG | 1 (1.3)   | 1 (0.7)    | 2.0 (0.1-34.1) |                   |               |
| rs9341134     | T | 8.1  | AA | 72 (88.9) | 134 (83.8) | 1.0 (ref)      | N/A               |               |
|               |   |      | AT | 8 (9.9)   | 26 (16.3)  | 0.7 (0.3-1.6)  |                   |               |
|               |   |      | TT | 1 (1.2)   | 0          | NC             |                   |               |
| rs9341145     | A | 8.5  | GG | 68 (87.2) | 133 (83.7) | 1.0 (ref)      | N/A               |               |
|               |   |      | GA | 8 (10.3)  | 25 (15.7)  | 0.6 (0.2-1.5)  |                   |               |
|               |   |      | AA | 2 (2.6)   | 1 (0.6)    | 3.7 (0.3-42.2) |                   |               |
| rs9341156     | A | 5.3  | GG | 75 (94.9) | 145 (89.5) | 1.0 (ref)      | N/A               |               |
|               |   |      | GA | 4 (5.1)   | 17 (10.5)  | 0.5 (0.2-1.5)  |                   |               |

|                      |   |      |    |           |            |                |     |
|----------------------|---|------|----|-----------|------------|----------------|-----|
|                      |   |      | AA | 0         | 0          | NC             |     |
| rs9341193            | T | 2.2  | CC | 75 (96.2) | 149 (95.5) | 1.0 (ref)      | N/A |
|                      |   |      | CT | 3 (3.8)   | 7 (4.5)    | 0.6 (0.1-2.8)  |     |
|                      |   |      | TT | 0         | 0          | NC             |     |
| rs9341197            | T | 2.5  | AA | 78 (95.1) | 153 (95.0) | 1.0 (ref)      | N/A |
|                      |   |      | AT | 4 (4.9)   | 8 (5.0)    | 0.8 (0.2-3.0)  |     |
|                      |   |      | TT | 0         | 0          | NC             |     |
| rs2270360            | C | 30.9 | AA | 42 (53.2) | 78 (48.8)  | 1.0 (ref)      | N/A |
|                      |   |      | AC | 32 (40.5) | 65 (40.6)  | 1.0 (0.6-1.8)  |     |
|                      |   |      | CC | 5 (6.3)   | 17 (10.6)  | 0.5 (0.1-1.5)  |     |
| <b>IGF1R</b>         |   |      |    |           |            |                |     |
| rs2229765            | G | 48.7 | AA | 15 (19.2) | 32 (20.4)  | 1.0 (ref)      | N/A |
|                      |   |      | AG | 52 (66.7) | 97 (61.8)  | 1.0 (0.5-1.9)  |     |
|                      |   |      | GG | 11 (14.1) | 28 (17.8)  | 0.7 (0.3-1.9)  |     |
| <b>IRS1</b>          |   |      |    |           |            |                |     |
| rs1801278<br>(G972R) | T | 2.5  | CC | 69 (86.3) | 153 (95.0) | 1.0 (ref)      | N/A |
|                      |   |      | CT | 11 (13.8) | 8 (5.0)    | 4.3 (1.5-12.1) |     |
|                      |   |      | TT | 0         | 0          | NC             |     |
| rs17208470           | A | 7.8  | CC | 61 (77.2) | 138 (85.7) | 1.0 (ref)      | N/A |
|                      |   |      | CA | 18 (22.8) | 21 (13.0)  | 2.2 (1.1-4.5)  |     |

|             |   |      |    |           |            |                |     |
|-------------|---|------|----|-----------|------------|----------------|-----|
|             |   |      | AA | 0         | 2 (1.2)    | NC             |     |
| rs1801123   | C | 7.6  | TT | 63 (81.8) | 133 (84.7) | 1.0 (ref)      | N/A |
|             |   |      | TC | 14 (18.2) | 24 (15.3)  | 1.3 (0.6-2.7)  |     |
|             |   |      | CC | 0         | 0          | NC             |     |
| <b>IRS2</b> |   |      |    |           |            |                |     |
| rs913949    | A | 18.5 | GG | 57 (69.5) | 109 (67.3) | 1.0 (ref)      | N/A |
|             |   |      | GA | 19 (23.2) | 46 (23.4)  | 0.8 (0.4-1.5)  |     |
|             |   |      | AA | 6 (7.3)   | 7 (4.3)    | 2.3 (0.7-8.1)  |     |
| rs874016    | A | 33.1 | GG | 38 (47.5) | 69 (43.1)  | 1.0 (ref)      | N/A |
|             |   |      | GA | 32 (40.0) | 76 (47.5)  | 0.7 (0.4-1.2)  |     |
|             |   |      | AA | 10 (12.5) | 15 (9.4)   | 1.2 (0.5-3.1)  |     |
| rs12584136  | A | 5.9  | CC | 73 (91.3) | 144 (88.9) | 1.0 (ref)      | N/A |
|             |   |      | CA | 6 (7.5)   | 17 (10.5)  | 0.5 (0.2-1.6)  |     |
|             |   |      | AA | 1 (1.3)   | 1 (0.6)    | 2.0 (0.1-32.7) |     |
| rs9559646   | C | 48.1 | TT | 27 (33.8) | 46 (29.1)  | 1.0 (ref)      | N/A |
|             |   |      | TC | 32 (40.0) | 72 (45.6)  | 0.7 (0.4-1.4)  |     |
|             |   |      | CC | 21 (26.3) | 40 (25.3)  | 0.9 (0.4-1.9)  |     |
| rs2241745   | C | 13.9 | TT | 55 (70.5) | 118 (74.7) | 1.0 (ref)      | N/A |
|             |   |      | TC | 20 (25.6) | 36 (22.8)  | 1.1 (0.6-2.2)  |     |
|             |   |      | CC | 3 (3.8)   | 4 (2.5)    | 1.6 (0.3-7.3)  |     |



|            |   |      |    |           |            |               |     |
|------------|---|------|----|-----------|------------|---------------|-----|
| rs7999797  | G | 44.7 | AA | 29 (35.8) | 52 (32.3)  | 1.0 (ref)     | N/A |
|            |   |      | AG | 33 (40.7) | 74 (46.0)  | 0.9 (0.4-1.7) |     |
|            |   |      | GG | 19 (23.5) | 35 (21.7)  | 1.0 (0.5-2.2) |     |
| rs4771646  | T | 32.1 | CC | 39 (48.1) | 77 (47.5)  | 1.0 (ref)     | N/A |
|            |   |      | CT | 29 (35.8) | 66 (40.7)  | 0.9 (0.5-1.7) |     |
|            |   |      | TT | 13 (16.0) | 19 (11.7)  | 1.1 (0.5-2.8) |     |
| rs12585507 | C | 7.6  | TT | 70 (88.6) | 134 (85.4) | 1.0 (ref)     | N/A |
|            |   |      | TC | 9 (11.4)  | 22 (14.0)  | 0.9 (0.4-2.2) |     |
|            |   |      | CC | 0         | 1 (0.6)    | NC            |     |
| rs11618950 | A | 18.7 | GG | 51 (63.0) | 110 (69.6) | 1.0 (ref)     | N/A |
|            |   |      | GA | 27 (33.3) | 37 (23.4)  | 1.8 (1.0-3.4) |     |
|            |   |      | AA | 3 (3.7)   | 11 (7.0)   | 0.9 (0.2-3.8) |     |

#### IL-6 signaling pathway genes

#### IL6

|           |   |      |    |           |            |               |     |
|-----------|---|------|----|-----------|------------|---------------|-----|
| rs2069832 | A | 43.8 | GG | 20 (25.0) | 50 (31.1)  | 1.0 (ref)     | N/A |
|           |   |      | GA | 49 (61.3) | 81 (50.3)  | 1.4 (0.7-2.7) |     |
|           |   |      | AA | 11 (13.8) | 30 (18.6)  | 0.8 (0.3-2.1) |     |
| rs2069837 | G | 5.4  | AA | 70 (85.4) | 141 (89.2) | 1.0 (ref)     | N/A |
|           |   |      | AG | 12 (14.6) | 17 (10.8)  | 1.5 (0.6-3.4) |     |
|           |   |      | GG | 0         | 0          | NC            |     |

|                         |   |      |    |           |            |               |     |
|-------------------------|---|------|----|-----------|------------|---------------|-----|
| rs2069840               | G | 32.2 | CC | 34 (43.0) | 69 (43.1)  | 1.0 (ref)     | N/A |
|                         |   |      | CG | 38 (48.1) | 79 (49.4)  | 1.1 (0.6-1.9) |     |
|                         |   |      | GG | 7 (8.9)   | 12 (7.5)   | 1.3 (0.4-3.9) |     |
| rs1800795<br>(-174 G/C) | C | 42.6 | GG | 21 (27.3) | 52 (32.1)  | 1.0 (ref)     | N/A |
|                         |   |      | GC | 46 (59.7) | 82 (50.6)  | 1.2 (0.6-2.2) |     |
|                         |   |      | CC | 10 (13.0) | 28 (17.3)  | 0.8 (0.3-1.9) |     |
| rs1800796<br>(-572 G/C) | C | 5.7  | GG | 67 (88.2) | 141 (88.9) | 1.0 (ref)     | N/A |
|                         |   |      | GC | 8 (10.5)  | 18 (11.3)  | 1.1 (0.4-2.7) |     |
|                         |   |      | CC | 1 (1.3)   | 0          | NC            |     |
| <b>IL6R</b>             |   |      |    |           |            |               |     |
| rs4845617               | A | 38.7 | GG | 30 (38.0) | 61 (38.4)  | 1.0 (ref)     | N/A |
|                         |   |      | GA | 28 (35.4) | 73 (45.9)  | 0.6 (0.3-1.1) |     |
|                         |   |      | AA | 21 (26.6) | 25 (15.7)  | 1.4 (0.6-2.8) |     |
| rs12083537              | C | 17.2 | TT | 50 (62.5) | 109 (68.1) | 1.0 (ref)     | N/A |
|                         |   |      | TC | 27 (33.8) | 47 (29.4)  | 1.2 (0.6-2.2) |     |
|                         |   |      | CC | 3 (3.8)   | 4 (2.5)    | 1.7 (0.4-7.8) |     |
| rs4075015               | A | 37.7 | TT | 32 (40.0) | 63 (39.9)  | 1.0 (ref)     | N/A |
|                         |   |      | TA | 35 (43.8) | 71 (44.9)  | 0.9 (0.5-1.7) |     |
|                         |   |      | AA | 13 (16.3) | 24 (15.2)  | 1.2 (0.5-2.7) |     |
| rs6684439               | T | 38.0 | CC | 21 (25.9) | 58 (35.8)  | 1.0 (ref)     | N/A |
|                         |   |      | CT | 42 (51.9) | 85 (52.5)  | 1.4 (0.7-2.8) |     |

|                                 |   |      |    |           |            |                 |     |
|---------------------------------|---|------|----|-----------|------------|-----------------|-----|
|                                 |   |      | TT | 18 (22.2) | 19 (11.7)  | 2.9 (1.2-7.0)   |     |
| rs7529229                       | C | 40.0 | TT | 21 (25.9) | 51 (32.3)  | 1.0 (ref)       | N/A |
|                                 |   |      | TC | 41 (50.6) | 88 (55.7)  | 1.1 (0.6-2.2)   |     |
|                                 |   |      | CC | 19 (23.5) | 19 (12.0)  | 2.5 (1.1-6.0)   |     |
| rs4845374                       | A | 17.9 | TT | 53 (67.1) | 108 (67.9) | 1.0 (ref)       | N/A |
|                                 |   |      | TA | 25 (31.7) | 45 (28.3)  | 1.2 (0.6-2.2)   |     |
|                                 |   |      | AA | 1 (1.3)   | 6 (3.8)    | 0.3 (0.04-2.9)  |     |
| rs10752641                      | G | 23.9 | CC | 56 (70.0) | 94 (59.1)  | 1.0 (ref)       | N/A |
|                                 |   |      | CG | 23 (28.8) | 54 (34.0)  | 0.7 (0.4-1.4)** |     |
|                                 |   |      | GG | 1 (1.3)   | 11 (6.9)   | NC              |     |
| rs8192284<br>(Ala358Asp, D358A) | C | 38.3 | AA | 24 (30.4) | 54 (34.2)  | 1.0 (ref)       | N/A |
|                                 |   |      | AC | 37 (46.8) | 87 (55.1)  | 0.9 (0.5-1.7)   |     |
|                                 |   |      | CC | 18 (22.8) | 17 (10.8)  | 2.5 (1.1-6.0)   |     |
| rs2229238                       | A | 17.7 | GG | 65 (81.3) | 108 (68.4) | 1.0 (ref)       | N/A |
|                                 |   |      | GA | 15 (18.8) | 44 (27.9)  | 0.5 (0.3-1.1)** |     |
|                                 |   |      | AA | 0         | 6 (3.8)    | NC              |     |
| rs4845623                       | G | 40.3 | AA | 18 (26.5) | 48 (33.1)  | 1.0 (ref)       | N/A |
|                                 |   |      | AG | 35 (51.5) | 77 (53.1)  | 1.1 (0.6-2.0)   |     |
|                                 |   |      | GG | 15 (22.1) | 20 (13.8)  | 1.6 (0.7-3.8)   |     |

### IL6ST (gp130)

|            |   |      |    |           |            |                |     |
|------------|---|------|----|-----------|------------|----------------|-----|
| rs1900173  | T | 9.3  | AA | 64 (81.1) | 133 (82.6) | 1.0 (ref)      | N/A |
|            |   |      | AT | 14 (17.7) | 26 (16.2)  | 1.0 (0.4-2.1)  |     |
|            |   |      | TT | 1 (1.3)   | 2 (1.2)    | 1.0 (0.1-11.9) |     |
| rs11574780 | C | 5.3  | TT | 76 (96.2) | 144 (89.4) | 1.0 (ref)      | N/A |
|            |   |      | TC | 3 (3.8)   | 17 (10.6)  | 0.4 (0.1-1.6)  |     |
|            |   |      | CC | 0         | 0          | NC             |     |
| rs10940495 | G | 27.5 | AA | 51 (62.2) | 82 (51.9)  | 1.0 (ref)      | N/A |
|            |   |      | AG | 27 (32.9) | 65 (41.1)  | 0.7 (0.4-1.2)  |     |
|            |   |      | GG | 4 (4.9)   | 11 (7.0)   | 0.7 (0.2-2.6)  |     |
| rs11744523 | A | 9.4  | TT | 51 (66.2) | 129 (81.1) | 1.0 (ref)      | N/A |
|            |   |      | TA | 26 (33.8) | 30 (18.9)  | 1.7 (0.9-3.3)  |     |
|            |   |      | AA | 0         | 0          | NC             |     |

---

Abbreviations: SNP, single nucleotide polymorphism; IGF, insulin-like growth factor; IL, interleukin; OR, odds ratio; CI, confidence interval; ref, reference category; IGFBP, IGF binding protein; NC, not computed; N/A, not available; IGF1R, IGF-1 receptor; IL6R, IL-6 receptor; IL6ST, IL-6 signal transducer.

\* The N's may not sum to the column total due to the omission of undetermined genotypes; the %'s reflect the proportion of successfully genotyped samples and may not sum to 100% due to rounding.

† The ORs and 95% CIs are from unconditional logistic regression models controlling for study population (i.e., gender), age (months), and body mass index (kg/m<sup>2</sup>).

‡ The BPC3 characterized three haplotype blocks that overlap IGFBP1 and IGFBP3 (Cheng et al., 2006; reference 24), and thus the data for the corresponding tagging SNPs are tabulated in order prior to those for IGFBP2, which contains no haplotype blocks.

§ Carriers of the homozygous wild type genotype comprise the reference category.

|| The OR was not computed due to one or more absent genotypes.

\*\* The OR and 95% CI were based on the best estimate of the maximum likelihood in a logistic regression model that did not converge.

†† Genotype data were not available for SNPs in IGFBP2, IGF1R, IRS1, IRS2, IL6, IL6R, or IL6ST in the supplemental controls.
